# Supplementary material for: A Multiple Stimuli–Responsive Ag/P/S Complex Showing Solvochromic and Mechanochromic Photoluminescence
Source: MDPI journal article supplement (doi:10.3390/molecules28145513), 2023-07-19
Supplement: s1 [file s1]

## Contents

**Table S1.** Selected bond lengths (Å) and angles (°) for **1·xSol**.

**Figure S1.** TGA curves of **1·xSol**, **1·2MeOH**, **1**, **1R**, **1G** and **1GR** under N<sub>2</sub> atmosphere.

**Figure S2.** IR spectra of **1·2MeOH** and HTZ.

**Figure S3.** <sup>1</sup>H NMR spectrum of **1·2MeOH**.

**Figure S4.** <sup>13</sup>C NMR spectrum of **1·2MeOH**.

**Figure S5.** <sup>31</sup>P NMR spectrum of **1·2MeOH**.

**Figures S6.** Transient photoluminescent data for **1·xSol** at ambient temperature.

**Figures S7.** Transient photoluminescent data for **1·2MeOH** at ambient temperature.

**Figures S8.** Transient photoluminescent data for **1** at ambient temperature.

**Figure S9.** Transient photoluminescent data for **1·2MeOH** ( $\lambda_{ex} = 373$  nm,  $\lambda_{em} = 465$  nm) at 80 K.

**Figure S10.** Transient photoluminescent data for **1·2MeOH** ( $\lambda_{ex} = 373$  nm,  $\lambda_{em} = 516$  nm) at 80 K.

**Figure S11.** IR spectra of **1·xSol**, **1·2MeOH**, **1**, **1G**, **1GR** and 3-bdppmapy in the region of 1800-1300 cm<sup>-1</sup>.

**Figure S12.** Emission wavelength of **1G/1GR** upon exposure to MeOH vapor and grinding over five cycles.

**Figure S13.** PXRD patterns for **1·xSol**, **1·2MeOH**, **1G** and **1GR**.

**Table S1.** Selected bond lengths (Å) and angles (°) for 1·xSol.

|         |            |            |           |
|---------|------------|------------|-----------|
| Ag1–Ag2 | 3.3076(5)  | S1–Ag1–S2  | 99.57(3)  |
| Ag1–S1  | 2.6388(10) | S1–Ag1–Ag2 | 50.71(2)  |
| Ag1–S2  | 2.5856(10) | S1–Ag2–S2  | 99.93(3)  |
| Ag1–P1  | 2.4667(10) | S1–Ag2–Ag1 | 51.29(2)  |
| Ag1–P2  | 2.4723(10) | S2–Ag1–Ag2 | 50.41(2)  |
| Ag2–S1  | 2.6173(10) | S2–Ag2–Ag1 | 50.21(2)  |
| Ag2–S2  | 2.5932(10) | P1–Ag1–Ag2 | 117.15(3) |
| Ag2–P3  | 2.4552(11) | P2–Ag1–Ag2 | 140.88(3) |
| Ag2–P4  | 2.4716(10) | P3–Ag2–Ag1 | 116.76(3) |
|         |            | P4–Ag2–Ag1 | 141.04(3) |

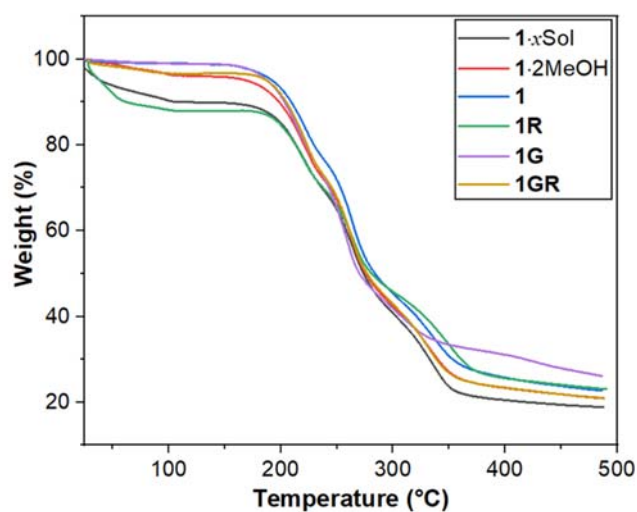

**Figure S1.** TGA curves of 1·xSol, 1·2MeOH, 1, 1R, 1G and 1GR under a N<sub>2</sub> atmosphere.

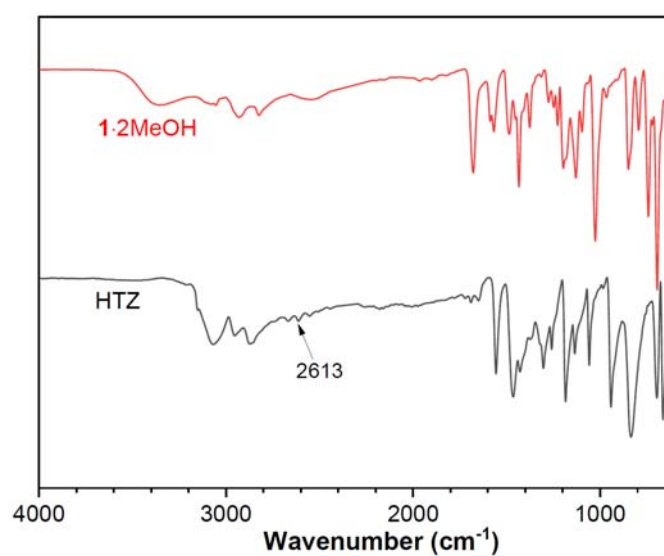

**Figure S2.** IR spectra of 1·2MeOH (red) and HTZ (black).

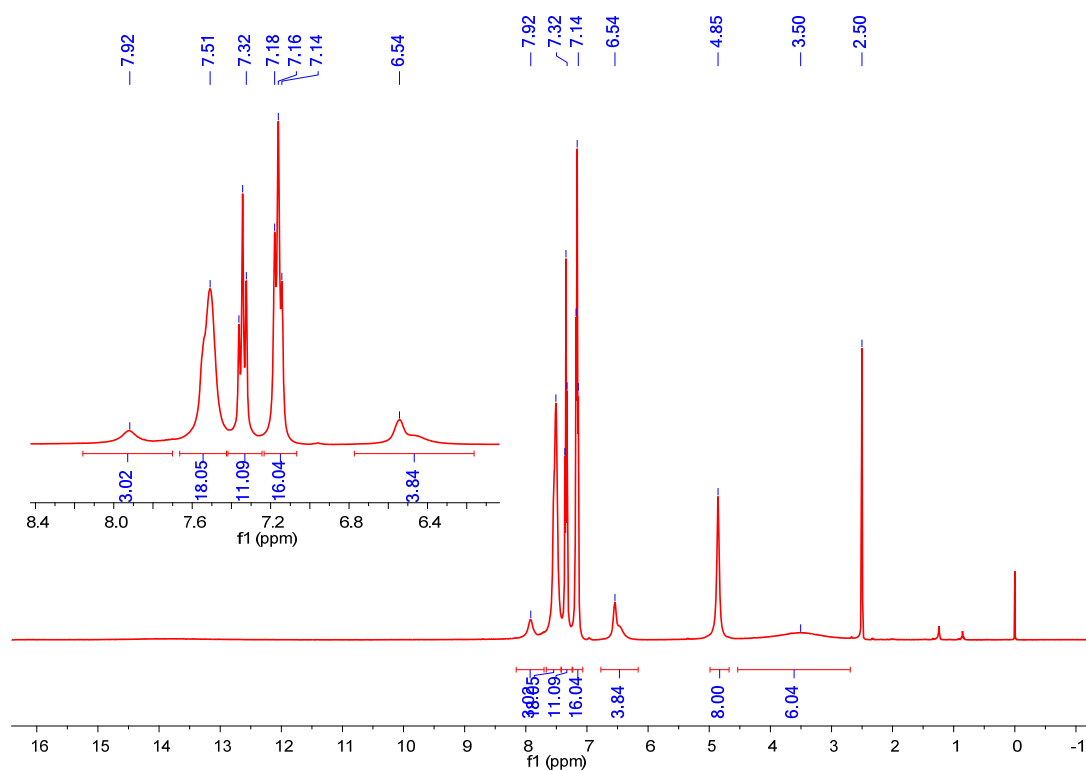

Figure S3. <sup>1</sup>H NMR spectrum of 1:2MeOH.

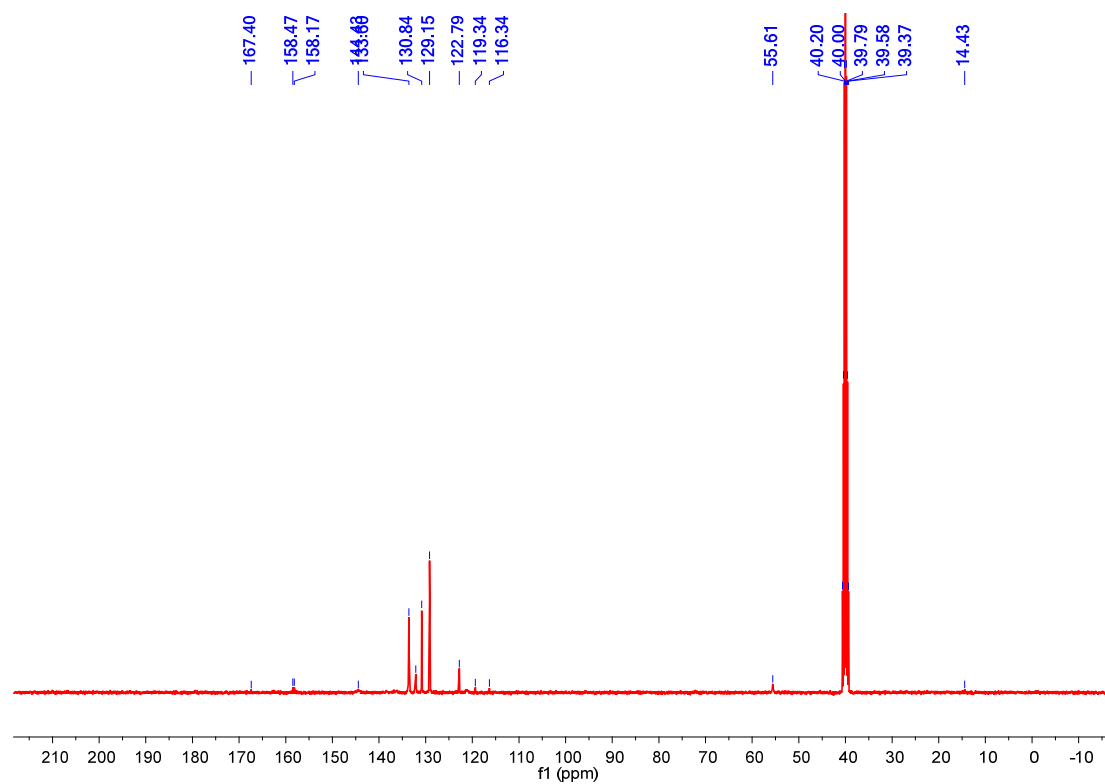

Figure S4. <sup>13</sup>C NMR spectrum of 1:2MeOH

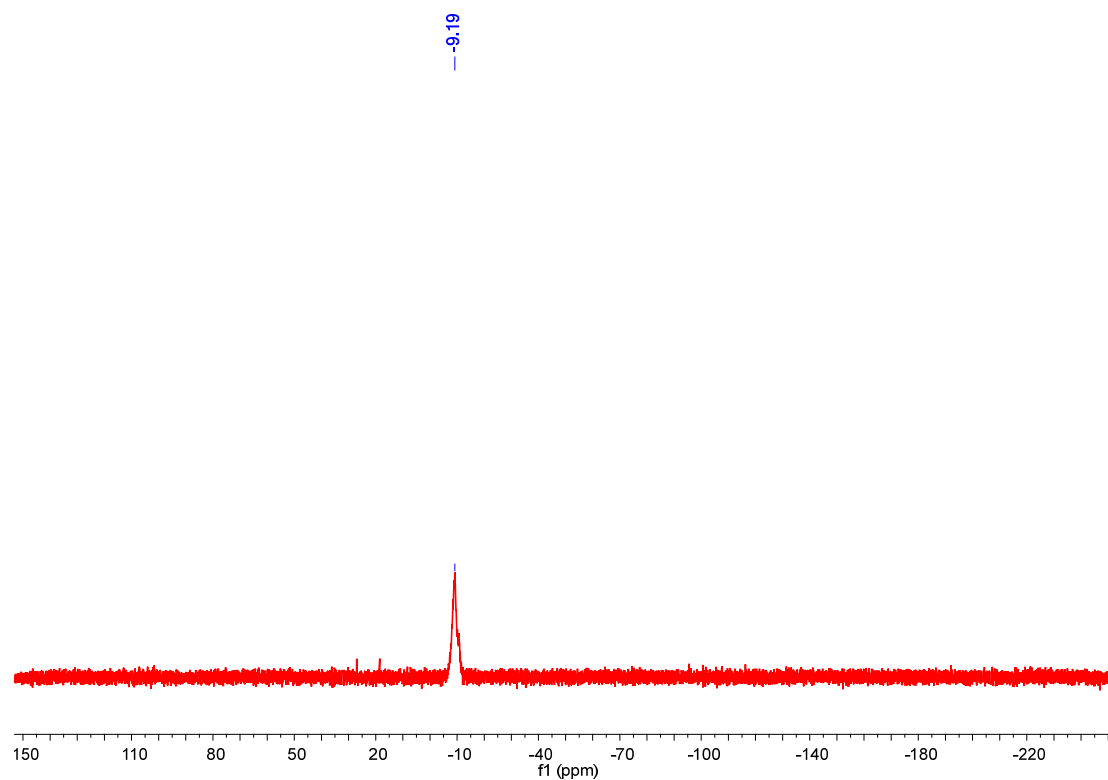

**Figure S5.**  $^{31}\text{P}$  NMR spectrum of **1**·2MeOH

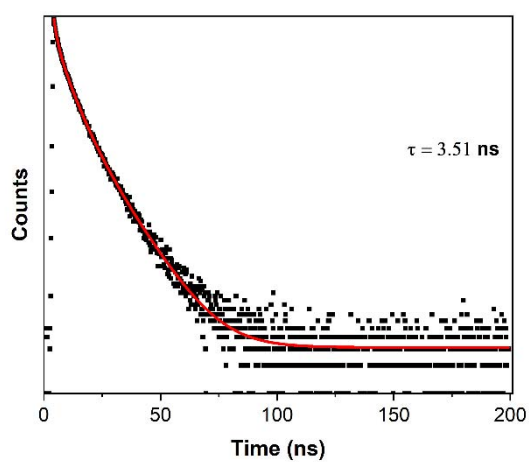

**Figure S6.** Transient photoluminescent data for **1**·xSol ( $\lambda_{\text{ex}} = 373 \text{ nm}$ ) at ambient temperature.

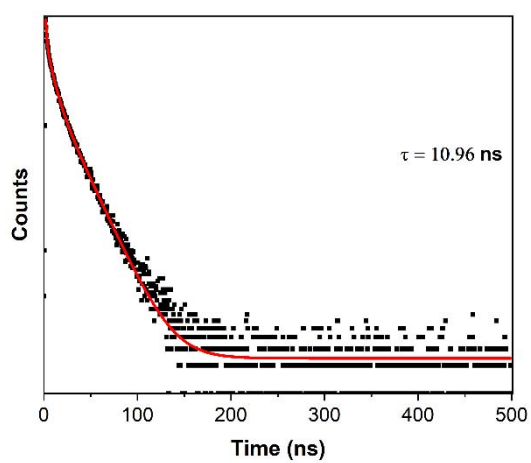

**Figure S7.** Transient photoluminescent data for 1:2MeOH ( $\lambda_{ex} = 373 \text{ nm}$ ) at ambient temperature.

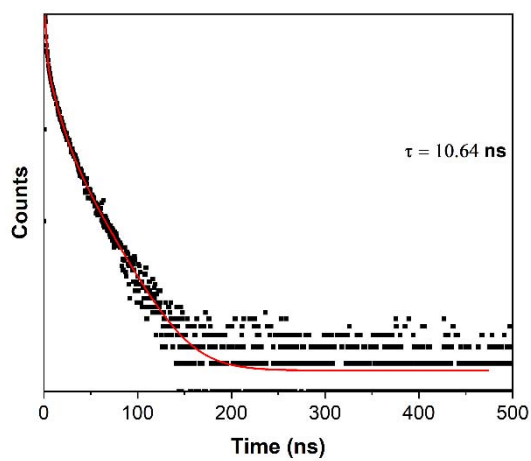

**Figure S8.** Transient photoluminescent data for **1** ( $\lambda_{ex} = 373 \text{ nm}$ ) at ambient temperature.

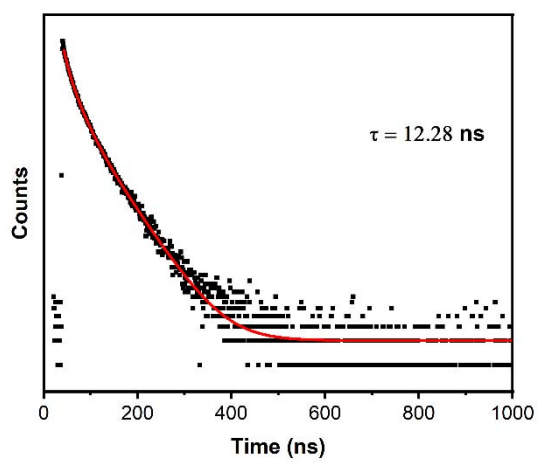

**Figure S9.** Transient photoluminescent data for 1:2MeOH ( $\lambda_{ex} = 373 \text{ nm}$ ,  $\lambda_{em} = 465 \text{ nm}$ ) at 80 K.

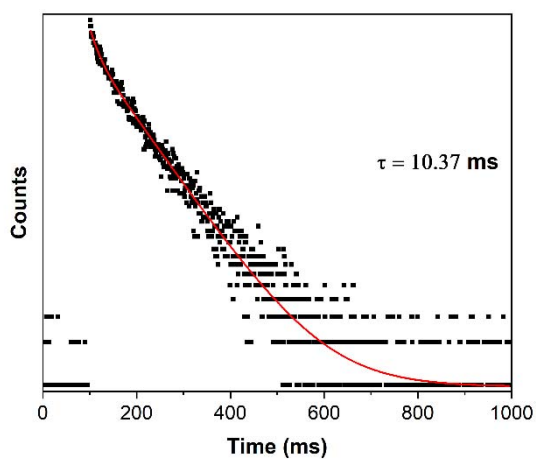

**Figure S10.** Transient photoluminescent data for 1·2MeOH ( $\lambda_{ex} = 373$  nm,  $\lambda_{em} = 516$  nm) at 80 K.

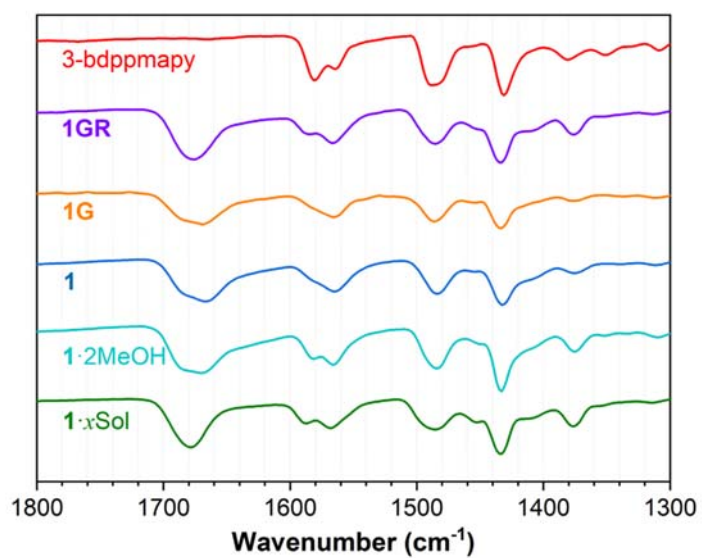

**Figure S11.** IR spectra of 1·xSol, 1·2MeOH, 1, 1G, 1GR and 3-bdppmapy in the region of 1800-1300  $\text{cm}^{-1}$ .

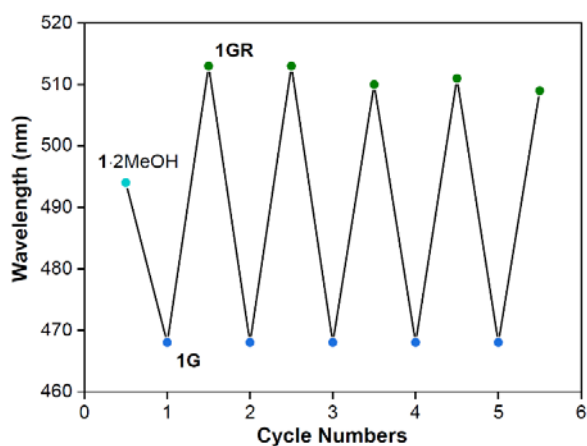

**Figure S12.** Emission wavelength of 1G/1GR upon exposure to MeOH vapor and grinding over five cycles.

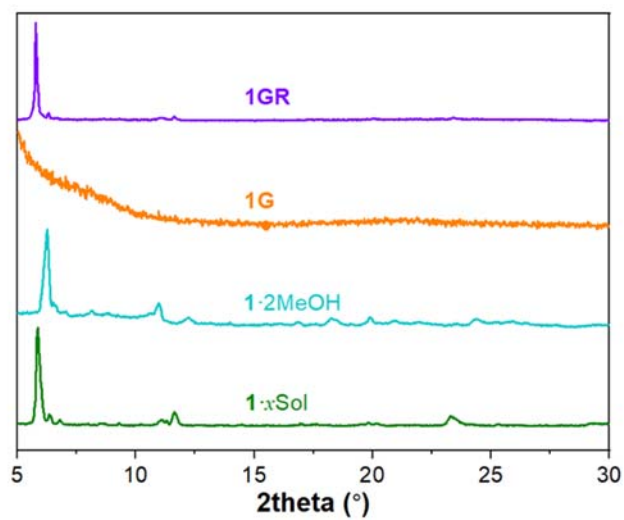

**Figure S13.** PXRD patterns for 1:χSol, 1:2MeOH, 1G and 1GR.
